# Supplementary material for: Host and Tissue Affiliations of Culturable Endophytic Fungi Associated with Xerophytic Plants in the Desert Region of Northwest China
Source: MDPI journal article supplement (doi:10.3390/agronomy12030727), 2022-03-17
Supplement: s1 [file s1]

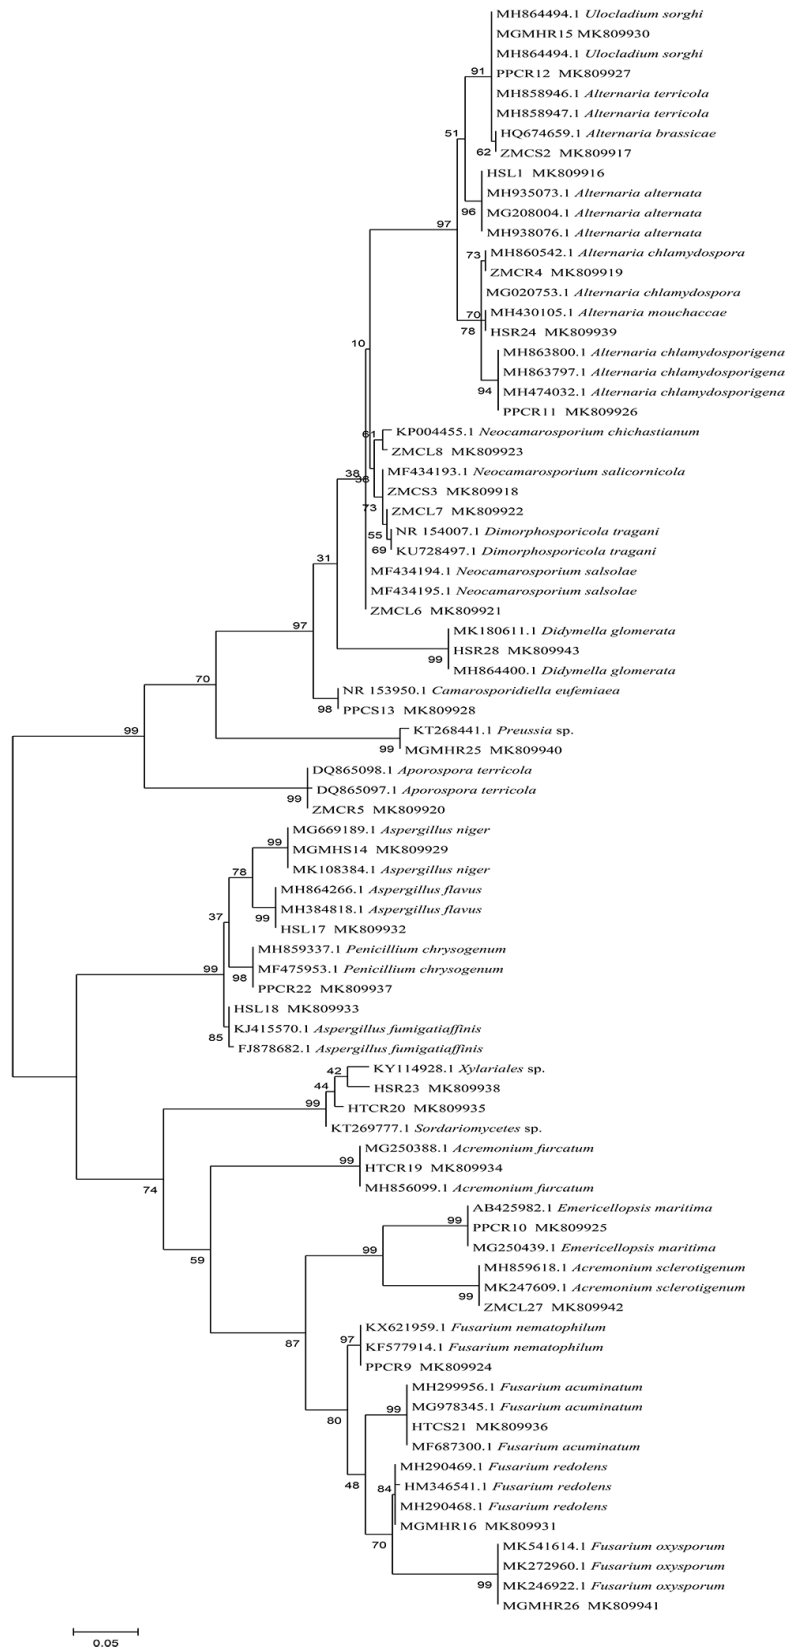

**Figure S1.** Maximum Likelihood tree based on rDNA ITS region sequences of 28 endophytic fungal isolates. Numbers (%) on the main branches represent bootstrap support values (for 1000 iterations). The scale bar shows a distance equal to 5% nucleotide diversity.

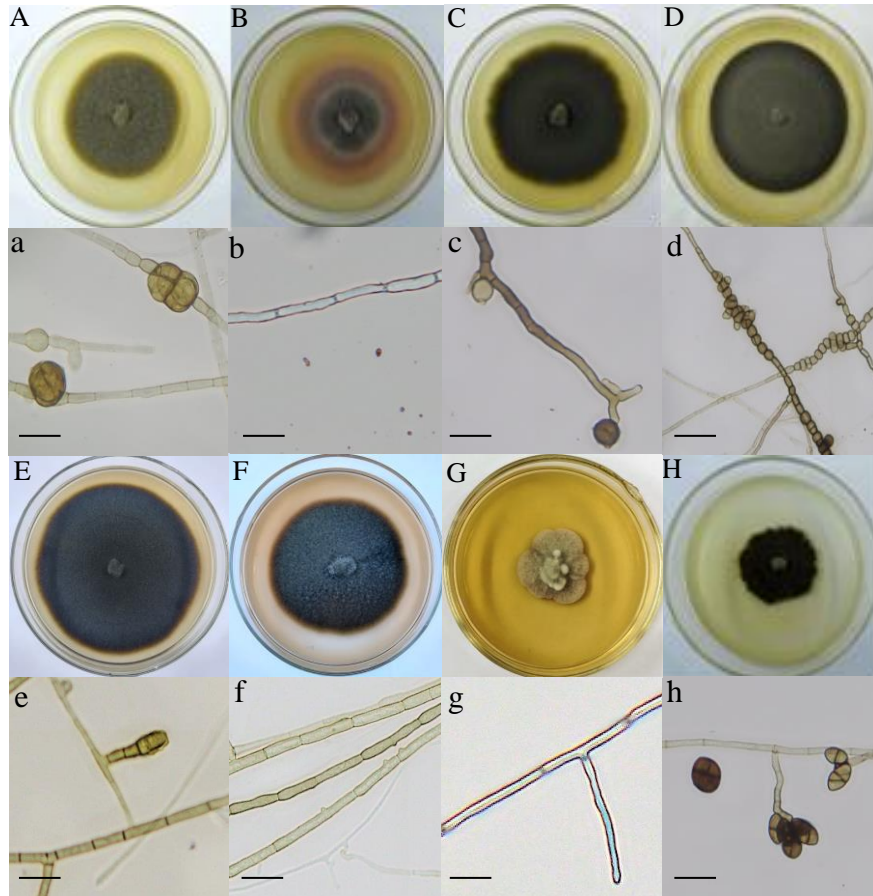

**Figure S2:** Morphological characteristics of endophytic fungi characterized by melanized structures and dark septate hyphae in culture isolated from the roots of five host plants. (A-H) Colonies of different endophytic fungi, and (a-h) microscopic morphology of endophytic fungi. Scale bars (a-h) = 50  $\mu$ m.

**Table S1** Physico-chemical characteristics of soils.

|                        | pH          | TN mg/g    | TP mg/g    | SOC mg/g    | ACP µg/g/h  | ALP µg/g/h   | U µg/g/h   |
|------------------------|-------------|------------|------------|-------------|-------------|--------------|------------|
| <i>E. przewalskii</i>  | 7.75±0.07c  | 0.68±0.02a | 0.55±0.01a | 3.36±0.49a  | 32.41±3.41a | 35.94±3.41ab | 0.27±0.06a |
| <i>S. passerina</i>    | 8.23±0.10bc | 0.76±0.02a | 0.50±0.03a | 15.75±5.94a | 21.20±1.49a | 15.87±1.49b  | 0.20±0.03a |
| <i>N. sphaerocarpa</i> | 8.00±0.06a  | 0.76±0.11a | 0.53±0.02a | 23.30±8.89a | 34.87±2.34a | 46.69±2.34a  | 0.20±0.03a |
| <i>R. songarica</i>    | 7.91±0.11ab | 0.70±0.05a | 0.54±0.02a | 17.98±2.03a | 18.65±3.17a | 40.68±3.17ab | 0.16±0.01a |
| <i>S. regelii</i>      | 8.39±0.03bc | 0.88±0.12a | 0.48±0.07a | 12.17±2.86a | 23.76±2.03a | 53.80±2.03a  | 0.21±0.02a |

Different lowercase letters represent significant differences among different plant species ( $p < 0.05$ ). TN, total nitrogen; TP, total phosphorus; SOC, soil organic carbon; ACP, acid phosphatase; ALP, alkaline phosphatase; U, urease.
